# Supplementary material
Source: publisher figshare collection journal article supplement (https://asha.figshare.com/articles/dataset/_/12735935)
Supplement: Supplementary file 1 [file 1]

**Supplemental Material S1.** Summary of regression analysis for variables predicting IPS scores across swallow tasks for age category, sex and race (Caucasian; African American).

| <b>Variable</b>         | <b>Age Category</b> | <b>Sex</b>    | <b>Race</b>     |
|-------------------------|---------------------|---------------|-----------------|
| Thin liquid             |                     |               |                 |
| 5 ml                    | .13                 | -.06          | <b>-.79*</b>    |
| Cup sip                 | -.20                | -.23          | -.43            |
| Sequential swallow      | .16                 | -.12          | <b>-1.09*</b>   |
| Nectar-thickened liquid |                     |               |                 |
| 5 ml                    | .25                 | -.10          | <b>-1.42***</b> |
| Cup sip                 | -.10                | -.20          | <b>-1.04**</b>  |
| Sequential swallow      | .14                 | -.41          | -.92            |
| Honey-thickened liquid  |                     |               |                 |
| Pudding                 | .13                 | -.36          | <b>-.94**</b>   |
| Solid                   | .16                 | -.27          | <b>-1.07**</b>  |
| IPS OI                  | .45                 | <b>-1.16*</b> | <b>-1.97*</b>   |

$p < .05^*$ ,  $p < .01^{**}$ ,  $p < .001^{***}$
