# Supplementary material
Source: publisher figshare collection journal article supplement (https://asha.figshare.com/articles/dataset/_/12735935)
Supplement: Supplementary file 2 [file 1]

**Supplemental Material S2.** Odds ratios (95% confidence interval [lower bound, upper bound]) of IPS scores across swallow tasks for age category, sex and race (Caucasian; African American).

| <b>Response Variable</b> | <b>Age Category</b><br>OR (95% CI) | <b>Sex</b><br>OR (95% CI) | <b>Race</b><br>OR (95% CI) |
|--------------------------|------------------------------------|---------------------------|----------------------------|
| Thin liquid              |                                    |                           |                            |
| 5 ml                     | 1.15 (.81, 1.61)                   | .94 (.52, 1.72)           | <b>.45* (.22, .91)</b>     |
| Cup sip                  | .82 (.64, 1.32)                    | .83 (.54, 1.64)           | .65 (.35, 1.21)            |
| Sequential swallow       | 1.17 (.79, 1.75)                   | .89 (.44, 1.81)           | <b>.33* (.11, .86)</b>     |
| Nectar-thickened liquid  |                                    |                           |                            |
| 5 ml                     | 1.28 (.90, 1.85)                   | .91 (.49, 1.71)           | <b>.24*** (.11, .50)</b>   |
| Cup sip                  | .90 (.62, 1.29)                    | .82 (.44, 1.54)           | <b>.35** (.17, .72)</b>    |
| Sequential swallow       | 1.15 (.79, 1.69)                   | .66 (.33, 1.31)           | .40 (.24, 1.01)            |
| Honey-thickened liquid   | 1.20 (.82, 1.76)                   | .70 (.36, 1.36)           | <b>.28*** (.13, .58)</b>   |
| Pudding                  | 1.14 (.81, 1.60)                   | .70 (.38, 1.27)           | <b>.39** (.19, .79)</b>    |
| Solid                    | 1.18 (.84, 1.67)                   | .76 (.42, 1.40)           | <b>.34** (.15, .73)</b>    |
| IPS OI                   | 1.57 (.90, 2.92)                   | <b>.31* (.10, .84)</b>    | <b>.14* (.01, .72)</b>     |

$p < .05^*$ ,  $p < .01^{**}$ ,  $p < .001^{***}$
